# Supplementary material
Source: publisher figshare collection journal article supplement (https://gsajournals.figshare.com/ndownloader/files/30613110)
Supplement: Supplementary file 1 [file 30613110]

## Sheet: Blatt1
Table S5. Comparison of variation between deletion and non-deletion nearly isogenic lines and isofemale lines from Munich, Germany (M12 and M9), Nicosia, Cyprus (C2) and Kuala Lumpur, Malaysia (KL) in terms of sequence divergence in SNPs/Kb and expression divergence represented as percentage of differentially expressed (% DE) genes at a false discovery rate of 5%.
Type	Comparison	Sites*	SNPs	SNPs/Kb	Genes**	DE genes	% DE
Nearly-isogenic	M12D v M12N	22610379	12	0.00053073	13742	30	0.218309
Nearly-isogenic	M9D v M9N	22604724	11124	0.49211	12411	395	3.18266
Nearly-isogenic	C2D v C2N	22464615	1657	0.0737604	13209	175	1.32485
Isofemale	M12D v M9D	22662796	27259	1.20281	13742	931	6.77485
	M12N v M9N	22300316	40303	1.80728	11878	1440	12.1233
	M12D v M9N	22473426	35900	1.59744	12411	1002	8.07348
	M9D v M12N	22453626	31032	1.38205	12144	931	7.66634
Isofemale	C2D v M12D	22406178	37705	1.68279	12144	1526	12.5659
	C2N v M12N	22367545	40398	1.8061	11878	1492	12.561
	C2D v M9D	22463295	35325	1.57257	12411	1075	8.66167
	C2N v M9N	22431945	41076	1.83114	12411	909	7.32415
Isofemale	KL1 v KL2	21958541	70649	3.21738	11612	1776	15.2945
Isofemale	Z197 v Z254	22189548	91704	4.13276	11878	1639	13.7986
	Z273 v Z418	22384831	65031	2.90514	12144	1847	15.2092
	Z197 v Z273	22415306	57381	2.5599	11878	2802	23.5898
	Z197 v Z418	22167707	103615	4.67414	11878	2211	18.6142
	Z254 v Z418	22161514	97989	4.42158	12677	1488	11.7378
	Z273 v Z254	22363832	55197	2.46814	12411	1708	13.762
* Transcribed sites with a minimum coverage of 20X
** Expressed genes with non-zero counts in all replicates for each comparison
